# Supplementary material
Source: Springer Nature journal article supplement (https://www.springermedizin.de/resource/supplementary/12958_2009_503_MOESM6_ESM.pdf/9568162)

# A State 3 respiration

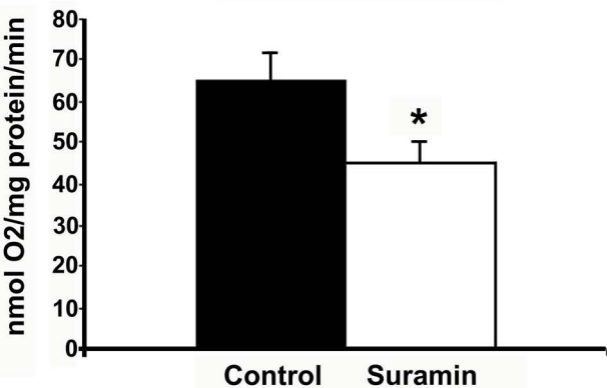

# B Total mitochondrial respiratory capacity

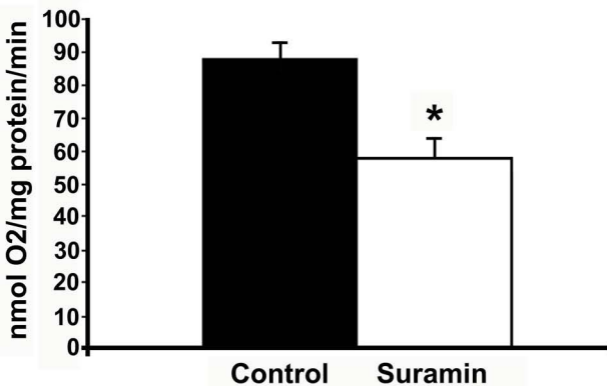

Supplement: MOESM6 [file 9568162]
